# Supplementary material
Source: PubMed Central journal article supplement (PMC6338878)
Supplement: pnas.1814377116.sapp.pdf [file pnas.1814377116.sapp.pdf]

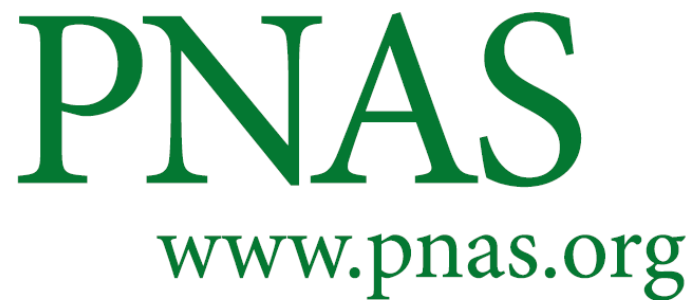

Supplementary Information for

**Constitutive Dicer1 Phosphorylation accelerates metabolism and aging *in vivo***

Neeraj K Aryal, Vinod Pant, Amanda R Wasylishen, Jan Parker-Thornburg, Laura Baseler, Adel K. El-Naggar, Bin Liu, Awdhesh Kalia, Guillermina Lozano, Swathi Arur.

Email: [glozano@mdanderson.org](mailto:glozano@mdanderson.org), [sarur@mdanderson.org](mailto:sarur@mdanderson.org)

**This PDF file includes:**

Supplementary Figure and Legends

Figs. S1 to S6

**Figure S1:**

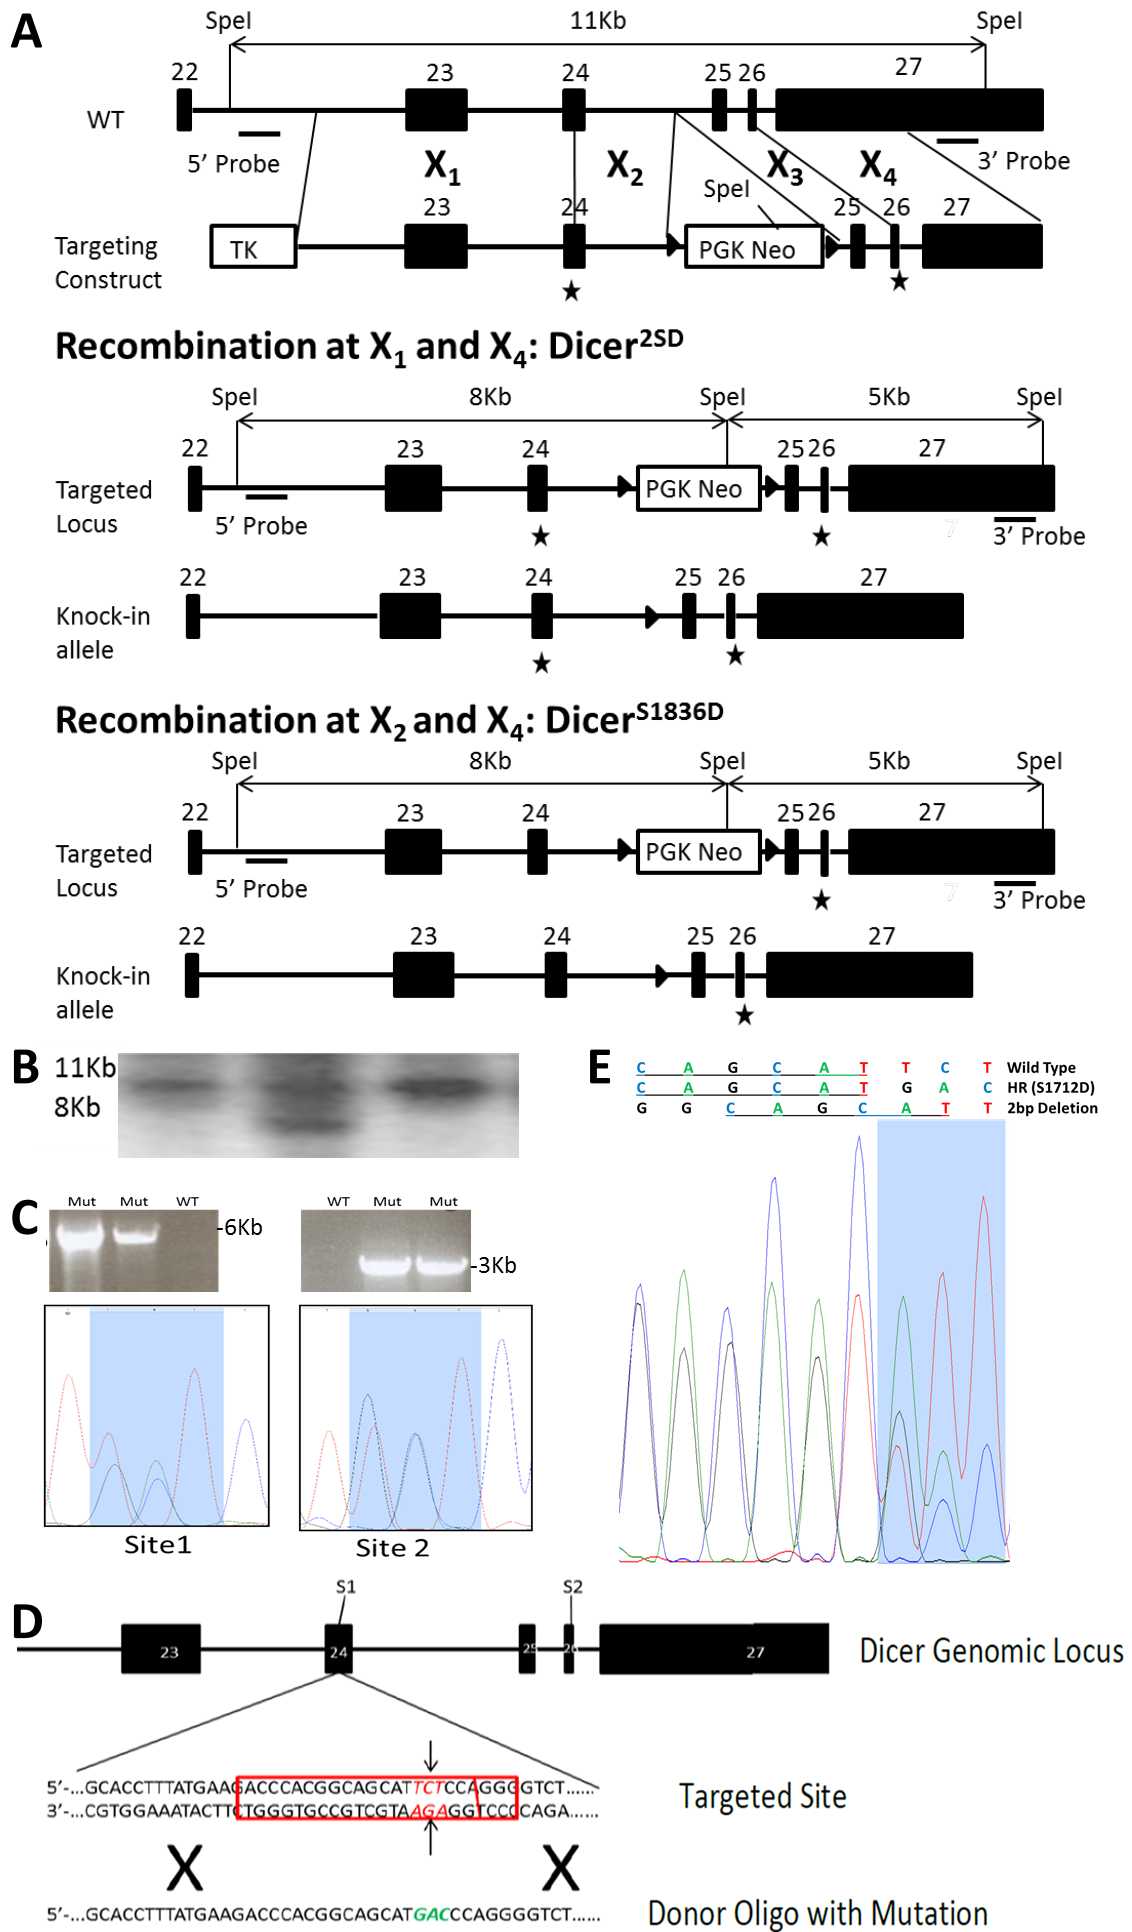

**Generation of phospho-mimetic Dicer1 mouse models. A.** DNA construct containing both mutations (S1836D and S1712D, marked by start symbol) was used to target endogenous Dicer1 locus in ES cells. Exes mark the possible recombination sites. SpeI restriction sites and expected size of DNA fragments are listed. **B.** Southern Blot using 5'-probe (see figure S1A) with 7.1Kb mutant band and 10.3Kb wild type DNA fragment. 8Kb and 11Kb markers (from DNA ladder) are shown. **C.** PCR based screening with one primer outside of targeted region and the other primer in the neo-R. Chromatographs from sequenced PCR fragment are shown. **D.** CRISPR/Cas9 based targeting to replace S1712 with aspartic acid in the endogenous Dicer1 locus of mouse zygote. **E.** Chromatographs from sequenced PCR fragment of mouse tail biopsy. Reverse primer was used for sequencing, and chromatograph is presented as reverse complement of the sequencing result.

**Figure S2:**

|                                                               |                             |                                 |                                  |         |
|---------------------------------------------------------------|-----------------------------|---------------------------------|----------------------------------|---------|
| <i>Dicer</i> <sup>+S1712D</sup> X <i>Dicer</i> <sup>+/-</sup> |                             |                                 |                                  |         |
| <i>Dicer</i> <sup>+/+</sup>                                   | <i>Dicer</i> <sup>+/-</sup> | <i>Dicer</i> <sup>+S1712D</sup> | <i>Dicer</i> <sup>S1712D/-</sup> | P-value |
| 6 (4.5)                                                       | 3 (4.5)                     | 5 (4.5)                         | 4 (4.5)                          | 0.77    |
| <i>Dicer</i> <sup>+Δ1712</sup> X <i>Dicer</i> <sup>+/-</sup>  |                             |                                 |                                  |         |
| <i>Dicer</i> <sup>+/+</sup>                                   | <i>Dicer</i> <sup>+/-</sup> | <i>Dicer</i> <sup>+Δ1712</sup>  | <i>Dicer</i> <sup>Δ1712/-</sup>  | P-value |
| 5 (4)                                                         | 4 (4)                       | 4 (4)                           | 3 (4)                            | 0.91    |
| <i>Dicer</i> <sup>+S1836D</sup> X <i>Dicer</i> <sup>+/-</sup> |                             |                                 |                                  |         |
| <i>Dicer</i> <sup>+/+</sup>                                   | <i>Dicer</i> <sup>+/-</sup> | <i>Dicer</i> <sup>+S1836D</sup> | <i>Dicer</i> <sup>S1836D/-</sup> | P-value |
| 8 (6)                                                         | 10 (6)                      | 6 (6)                           | 0 (6)                            | 0.02    |
| <i>Dicer</i> <sup>+2SD</sup> X <i>Dicer</i> <sup>+/-</sup>    |                             |                                 |                                  |         |
| <i>Dicer</i> <sup>+/+</sup>                                   | <i>Dicer</i> <sup>+/-</sup> | <i>Dicer</i> <sup>+2SD</sup>    | <i>Dicer</i> <sup>2SD/-</sup>    | P-value |
| 8 (5.5)                                                       | 7 (5.5)                     | 7 (5.5)                         | 0 (5.5)                          | 0.05    |

*Dicer*<sup>S1836D</sup> and *Dicer*<sup>2SD</sup> are hypomorphic alleles. Expected numbers are in parenthesis.

**Figure S3:**

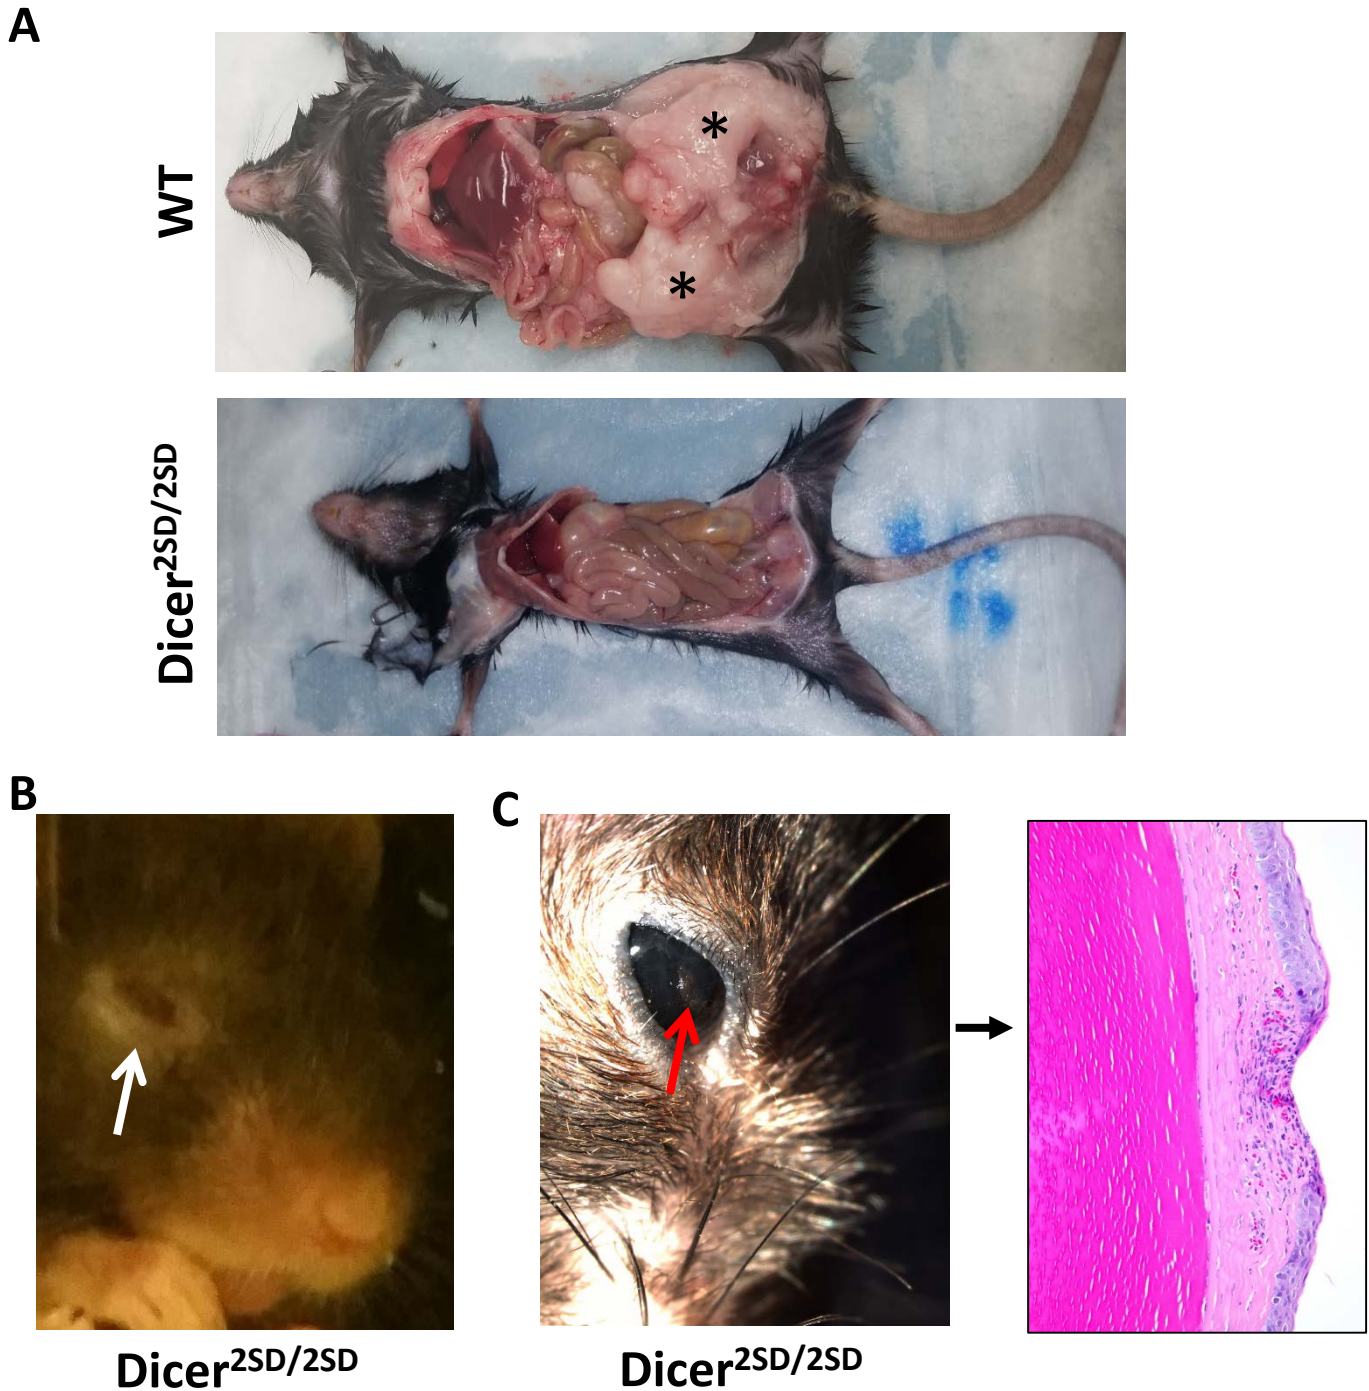

**Loss of abdominal fat and development of ocular lesions in *Dicer*<sup>2SD/2SD</sup> mice . A.** Representative images of ten month-old wild type and *Dicer*<sup>2SD/2SD</sup> mouse showing visceral fat (asterisk). **B.** Representative image of neutrophilic conjunctivitis (arrow, white discoloration around the eyes) in a four month-old *Dicer*<sup>2SD/2SD</sup> mouse. **C.** Macroscopic and microscopic images of a chronic corneal ulcer in an eight month-old *Dicer*<sup>2SD/2SD</sup> mouse.

Figure S4:

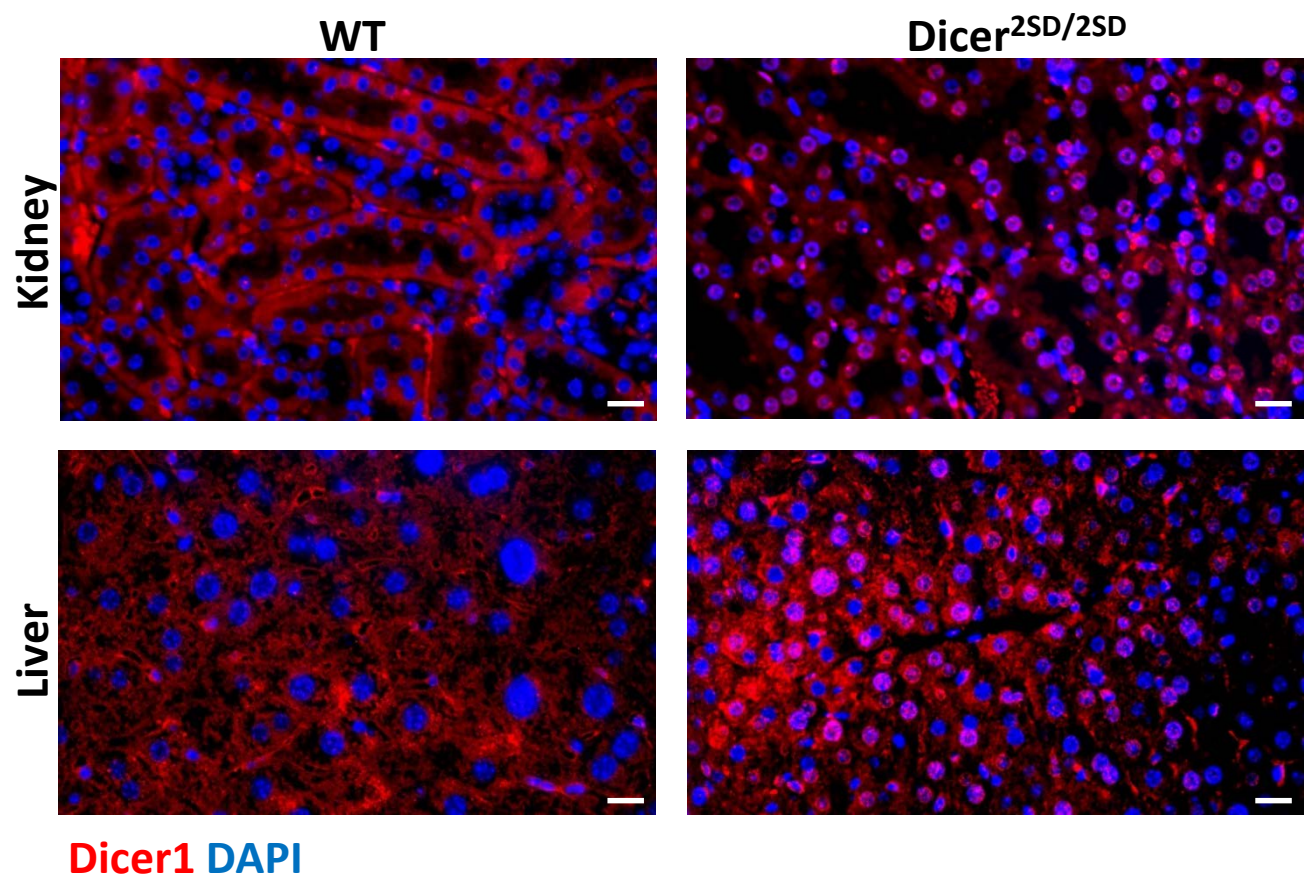

**Dicer1 Localization.** Immuno-fluorescence with anti-Dicer1 antibody (red) on representative kidney and liver sections from wild type (WT), and *Dicer*<sup>2SD/2SD</sup> mice. Scale bars = 20 $\mu$ m.



**Figure S5:**

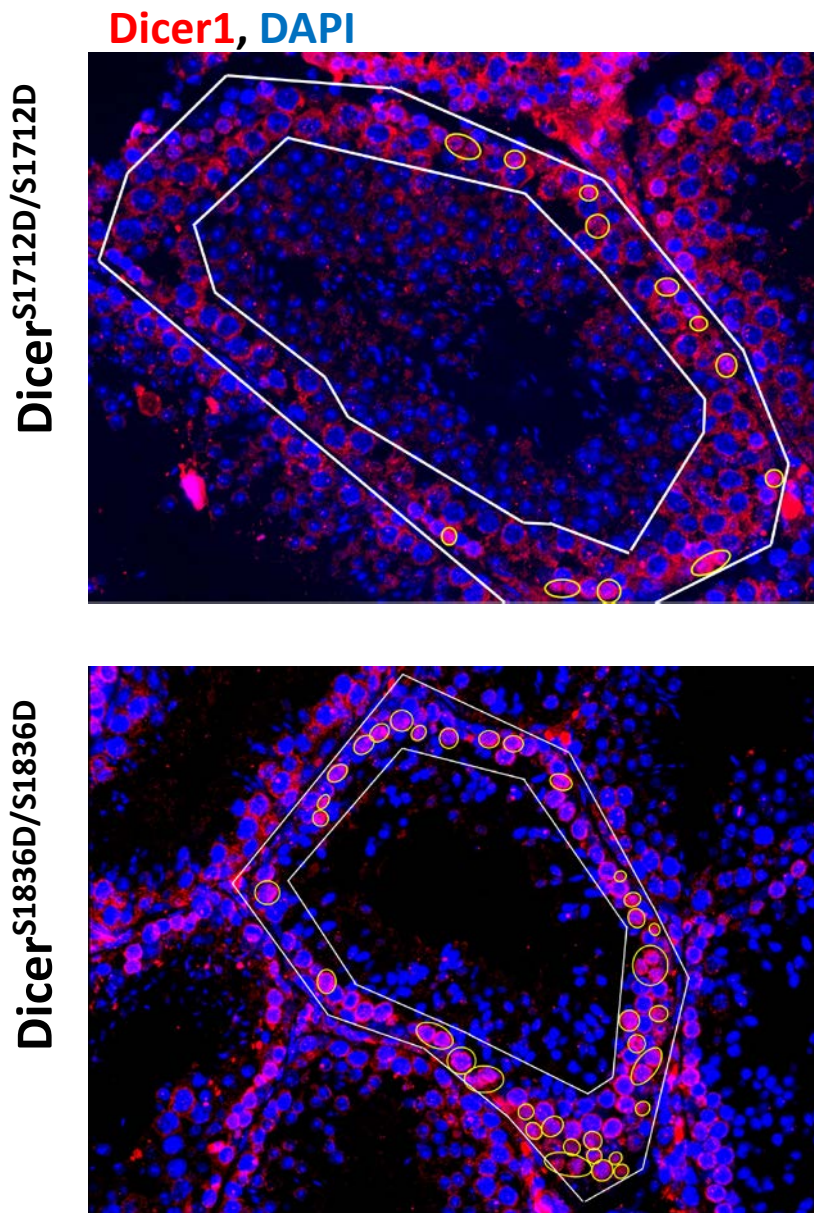

**Quantification of spermatocytes with nuclear accumulation of Dicer1** Immuno-fluorescence with anti-Dicer1 antibody (red) on representative testes sections (20X) from *Dicer*<sup>S1712D/S1712D</sup> and *Dicer*<sup>S1836D/S1836D</sup> mice. Cells inside the white margins were included for quantification. Circled cells are counted as positive for nuclear accumulation. Cells with nuclear signal in >50% of nuclear surface (visually determined) were considered positive for nuclear accumulation.

**Figure S6:**

| #  | KEGG Pathway                                | P-value    |
|----|---------------------------------------------|------------|
| 1  | Prion disease                               | 2.5515e-10 |
| 2  | Fatty acid biosynthesis                     | 1.3331e-09 |
| 3  | Fatty acid metabolism                       | 4.2871e-09 |
| 4  | Proteoglycans in cancer                     | 4.6287e-07 |
| 5  | Renal cell carcinoma                        | 1.9558e-05 |
| 6  | Thyroid hormone signaling pathway           | 2.8087e-05 |
| 7  | Protein processing in endoplasmic reticulum | 8.2850e-05 |
| 8  | Axon guidance                               | 8.4420e-05 |
| 9  | N-Glycan biosynthesis                       | 9.3190e-05 |
| 10 | Long-term potentiation                      | 0.0001     |
| 11 | TGF-beta signaling pathway                  | 0.0002     |
| 12 | Lysine degradation                          | 0.0004     |
| 13 | T cell receptor signaling pathway           | 0.0005     |
| 14 | Hippo signaling pathway                     | 0.0005     |
| 15 | FoxO signaling pathway                      | 0.0010     |
| 16 | Fatty acid elongation                       | 0.0011     |
| 17 | Phosphatidylinositol signaling system       | 0.0019     |
| 18 | Long-term depression                        | 0.0019     |
| 19 | Ubiquitin mediated proteolysis              | 0.0027     |
| 20 | Pathways in cancer                          | 0.0027     |
| 21 | MAPK signaling pathway                      | 0.0051     |
| 22 | Endocytosis                                 | 0.0059     |
| 23 | Wnt signaling pathway                       | 0.0059     |
| 24 | Adherens junction                           | 0.0082     |
| 25 | Gap junction                                | 0.0094     |

Pathway analysis of downregulated miRNAs in Dicer<sup>2SD/2SD</sup> MEFs
